# Supplementary material
Source: Springer Nature journal article supplement (https://www.springermedizin.de/resource/supplementary/12936_2012_2489_MOESM9_ESM.pdf/9542768)

SPR (%), pre-intervention (2001-2005)

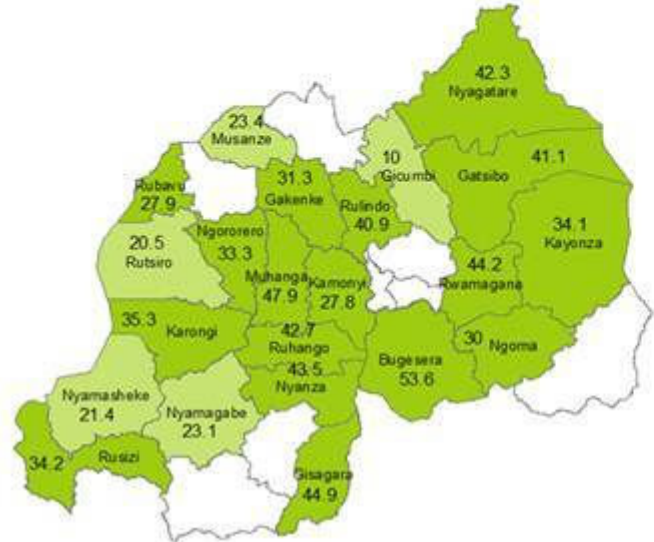

SPR (%), post-intervention (2006-2010)

- < 5%
- 5 – 10%
- > 10%
- No Data

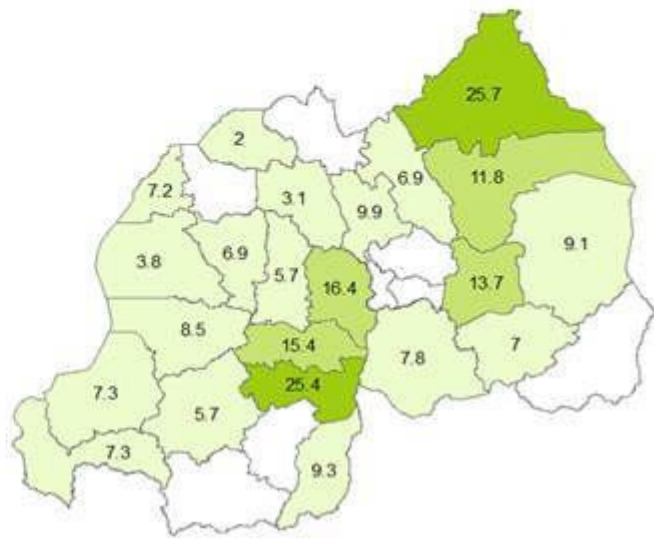

Malaria admissions/1000, pre-intervention (2001-2005)

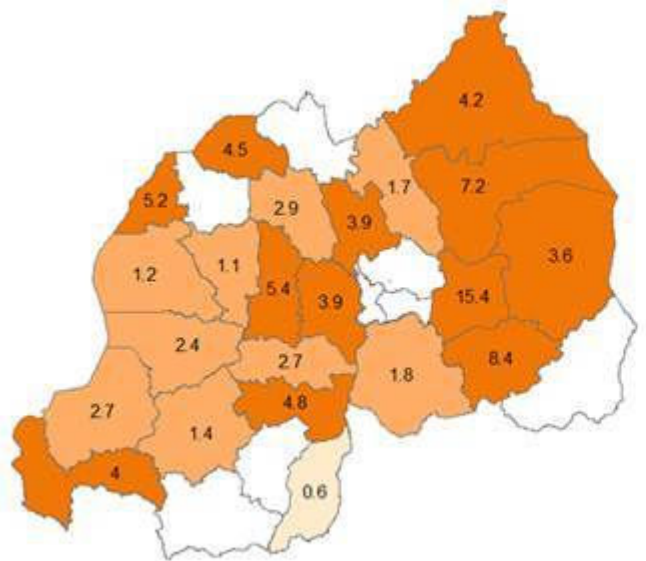

Malaria admissions/1000, post-intervention (2006-2010)

- < 1/1000
- 1 – 3/1000
- > 3/1000
- No adequate data

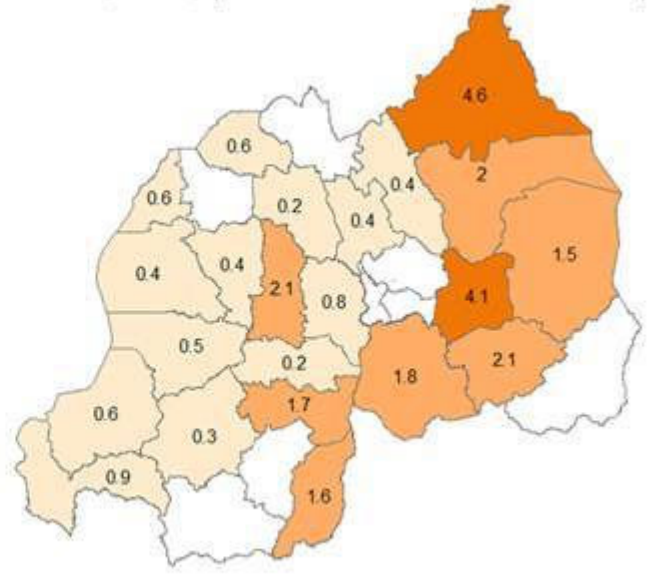

Supplement: MOESM9 [file 9542768]
